# Supplementary material for: Visible-light-driven Z-scheme rGO/Bi2S3–BiOBr heterojunctions with tunable exposed BiOBr (102) facets for efficient synchronous photocatalytic degradation of 2-nitrophenol and Cr(vi) reduction
Source: Royal Society of Chemistry journal article supplement (doi:10.1039/c9en00957d), 2019-01-01
Supplement: c9en00957d1.pdf [file c9en00957d1.pdf]

**Supporting Information for manuscript entitled**

**Visible-light-driven Z-scheme rGO/Bi<sub>2</sub>S<sub>3</sub>-BiOBr heterojunction with tunable exposed BiOBr (102) facets for efficient synchronous photocatalytic degradation of 2-nitrophenol and Cr(VI) reduction**

Hui Li, Fang Deng\*, Yang Zheng, Li Hua, Chunhua Qu, Xubiao Luo\*

*Key Laboratory of Jiangxi Province for Persistent Contaminants Control and Resources Recycle, Nanchang Hangkong University, Nanchang 330063, PR China*

This Supporting Information Contains the Following Sections:

S1: Tauc's formula:

$$(\alpha hv)^n = k(hv - E_g)$$

where  $\alpha$ ,  $\nu$  and  $h$  is absorption coefficient, light frequency and Planck's constant, respectively.  $n = 2$  for a direct semiconductor and  $n = 1/2$  for indirect semiconductor.

**Fig. S1** The proportion optimization of Bi<sub>2</sub>S<sub>3</sub>-BiOBr.

**Fig. S2** (a) UV-Vis diffuse reflectance spectra of pure Bi<sub>2</sub>S<sub>3</sub>, pure BiOBr, Bi<sub>2</sub>S<sub>3</sub>-BiOBr and rGO/Bi<sub>2</sub>S<sub>3</sub>-BiOBr, (b) curves of  $(\alpha hv)^2$  versus  $hv$  of pure BiOBr and  $(\alpha hv)^{1/2}$  versus  $hv$  of pure Bi<sub>2</sub>S<sub>3</sub>, (c) curves of  $(\alpha hv)^{1/2}$  versus  $hv$  of Bi<sub>2</sub>S<sub>3</sub>-BiOBr and rGO/Bi<sub>2</sub>S<sub>3</sub>-BiOBr.

**Fig. S3** Mott-Schottky curves of pure Bi<sub>2</sub>S<sub>3</sub>, pure BiOBr, Bi<sub>2</sub>S<sub>3</sub>-BiOBr and rGO/Bi<sub>2</sub>S<sub>3</sub>-BiOBr.

**Fig. S4** (a) Photocurrent response, (b) electrochemical impedance spectra of pure Bi<sub>2</sub>S<sub>3</sub>, pure BiOBr, Bi<sub>2</sub>S<sub>3</sub>-BiOBr and rGO/Bi<sub>2</sub>S<sub>3</sub>-BiOBr.

**Fig. S5** Dark adsorption behavior (catalyst without light) of pure  $\text{Bi}_2\text{S}_3$ , pure  $\text{BiOBr}$ ,  $\text{Bi}_2\text{S}_3$ - $\text{BiOBr}$  and  $\text{rGO}/\text{Bi}_2\text{S}_3$ - $\text{BiOBr}$ .

**Table S1**  $E_g$ ,  $V_{fb}$ ,  $E_{CB}$  and  $E_{VB}$  values of pure  $\text{Bi}_2\text{S}_3$ , pure  $\text{BiOBr}$ ,  $\text{Bi}_2\text{S}_3$ - $\text{BiOBr}$  and  $\text{rGO}/\text{Bi}_2\text{S}_3$ - $\text{BiOBr}$ .

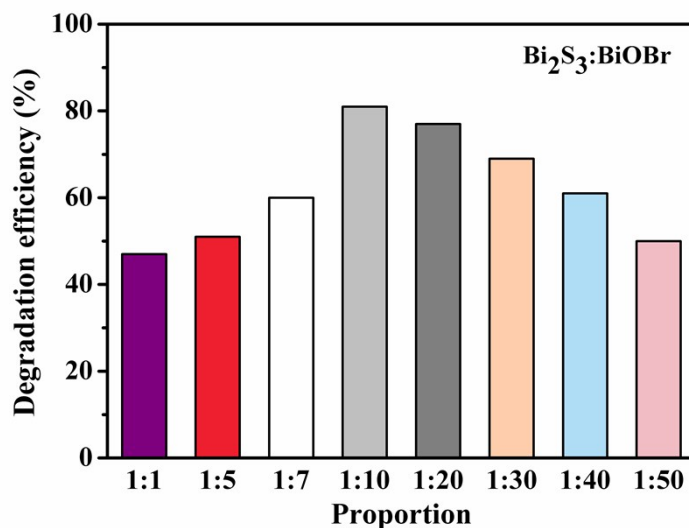

**Fig. S1**

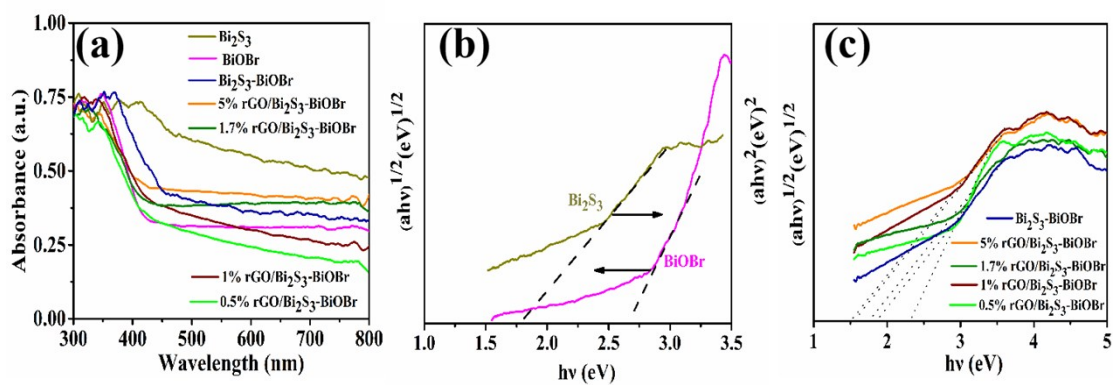

**Fig. S2**

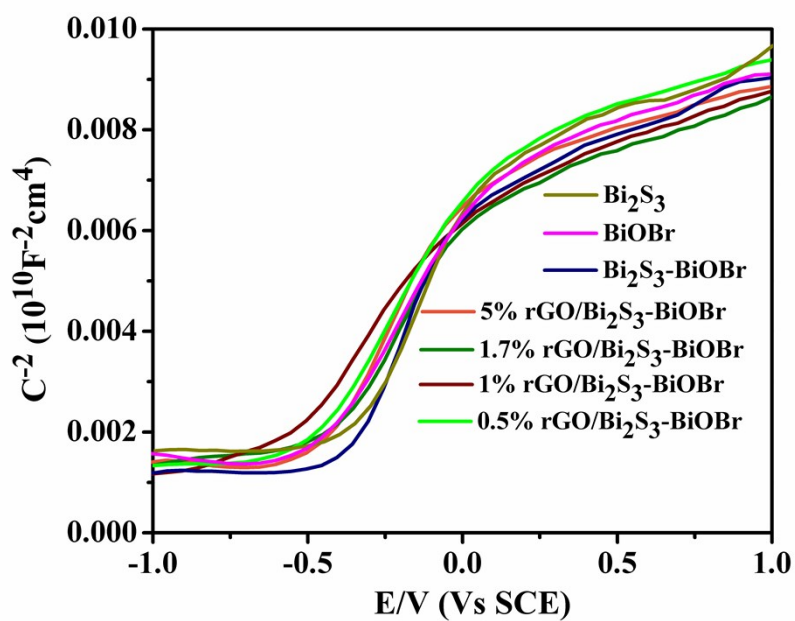

Fig. S3

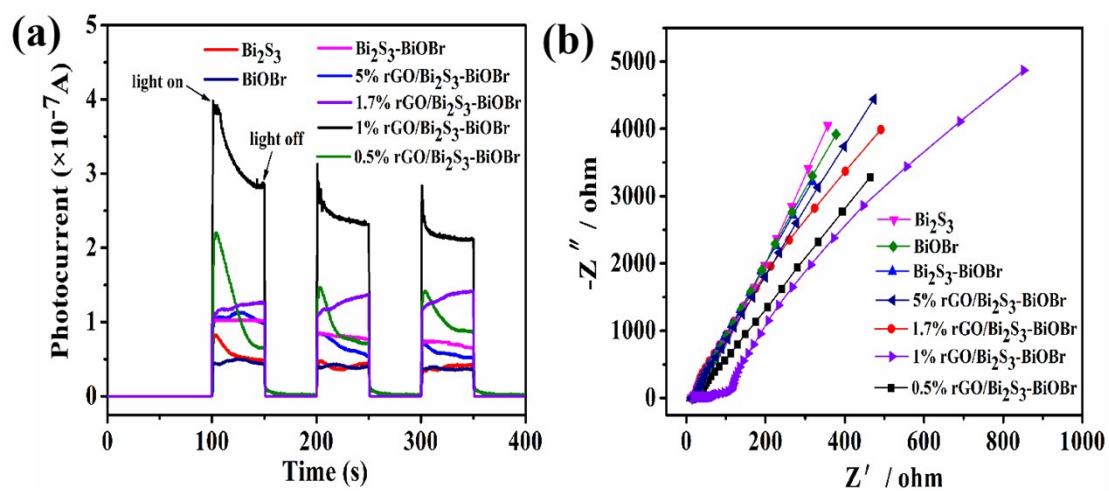

Fig. S4

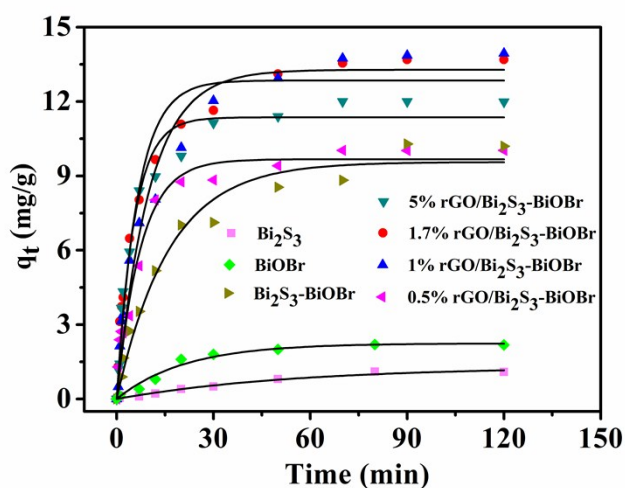

Fig. S5

**Table S1**  $E_g$ ,  $V_{fb}$ ,  $E_{CB}$  and  $E_{VB}$  values of pure Bi<sub>2</sub>S<sub>3</sub>, pure BiOBr, Bi<sub>2</sub>S<sub>3</sub>-BiOBr and rGO/Bi<sub>2</sub>S<sub>3</sub>-BiOBr

| Samples                                        | $E_g$ (eV) | $V_{fb}$ (V vs. SCE) | $E_{CB}$ (eV) | $E_{VB}$ (eV) |
|------------------------------------------------|------------|----------------------|---------------|---------------|
| Bi <sub>2</sub> S <sub>3</sub>                 | 1.76       | -0.35                | -0.11         | 1.65          |
| BiOBr                                          | 2.72       | -0.56                | -0.32         | 2.40          |
| Bi <sub>2</sub> S <sub>3</sub> -BiOBr          | 1.85       | -0.41                | -0.17         | 1.68          |
| 0.5% rGO/Bi <sub>2</sub> S <sub>3</sub> -BiOBr | 2.31       | -0.61                | -0.37         | 1.94          |
| 1% rGO/Bi <sub>2</sub> S <sub>3</sub> -BiOBr   | 1.49       | -0.72                | -0.48         | 1.01          |
| 1.7% rGO/Bi <sub>2</sub> S <sub>3</sub> -BiOBr | 1.75       | -0.54                | -0.30         | 1.45          |
| 5% rGO/Bi <sub>2</sub> S <sub>3</sub> -BiOBr   | 1.58       | -0.55                | -0.31         | 1.27          |
